# Supplementary material for: The Paleocene–Eocene Thermal Maximum at DSDP Site 277, Campbell Plateau, southern Pacific Ocean
Source: Copernicus journal article supplement (doi:10.5194/cp-11-1009-2015), 2015-07-31
Supplement: Supplementary file 1 [file cp-11-1009-2015-supplement.zip]

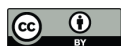

## *Supplement of*

# **The Paleocene–Eocene Thermal Maximum at DSDP Site 277, Campbell Plateau, southern Pacific Ocean**

**C. J. Hollis et al.**

*Correspondence to:* C. J. Hollis (c.hollis@gns.cri.nz)

- cp-11-1009-2015-supplement-title-page.pdf
- Hollis&\_Supplement.doc
- Table S1\_XRF.xlsx
- Table S2\_Rmag.xlsx
- Table S3\_nannos.xlsx
- Table S4\_forams.xlsx
- Table S5\_isotopes.xlsx
- Table S6\_MgCa.xlsx
- Table S7\_datums.xlsx

The copyright of individual parts of the supplement might differ from the CC-BY 3.0 licence.
